# Supplementary material for: Hot carriers in epitaxial graphene sheets with and without hydrogen intercalation: role of substrate coupling
Source: Royal Society of Chemistry journal article supplement (doi:10.1039/c4nr02980a), 2014-01-01
Supplement: c4nr02980a1.pdf [file c4nr02980a1.pdf]

Supporting Information

**Hot carriers in epitaxial graphene sheets with and without hydrogen intercalation: role of substrate coupling**

Fan-Hung Liu<sup>1</sup>, Shun-Tsung Lo<sup>1\*</sup>, Chiashain Chuang<sup>2</sup>, Tak-Pong Woo<sup>2</sup>, Hsin-Yen Lee<sup>2</sup>, Chieh-Wen Liu<sup>1</sup>, Chieh-I Liu<sup>1</sup>, Lung-I Huang<sup>2,3</sup>, Cheng-Hua Liu<sup>2</sup>, Yanfei Yang<sup>3</sup>, Chih-Yuan Chang<sup>4</sup>, Lain-Jong Li<sup>4</sup>, Patrick C. Mende<sup>5</sup>, Randall M. Feenstra<sup>5</sup>, Randolph E. Elmquist<sup>3\*</sup>, and Chi-Te Liang<sup>1,2</sup>

<sup>1</sup>*Graduate Institute of Applied Physics, National Taiwan University, Taipei 106, Taiwan*

<sup>2</sup>*Department of Physics, National Taiwan University, Taipei 106, Taiwan*

<sup>3</sup>*National Institute of Standards and Technology (NIST), Gaithersburg, MD 20899, USA*

<sup>4</sup>*Institute of Atomic and Molecular Sciences, Academia Sinica, Taipei 106, Taiwan*

<sup>5</sup>*Department of Physics, Carnegie Mellon University, Pittsburgh, PA, 15213, USA*

\* Corresponding authors: shuntsunglo@gmail.com and randolph.elmquist@nist.gov

a)

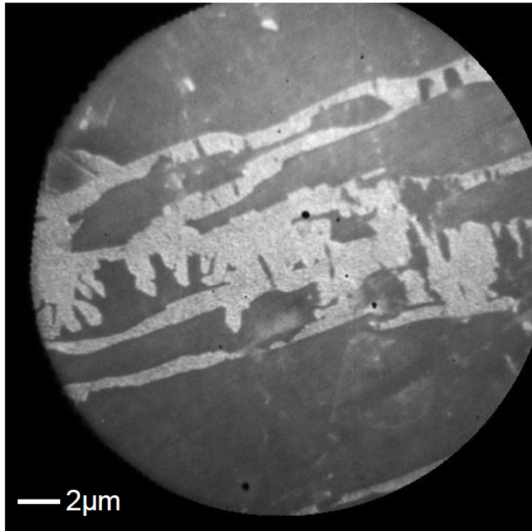

b)

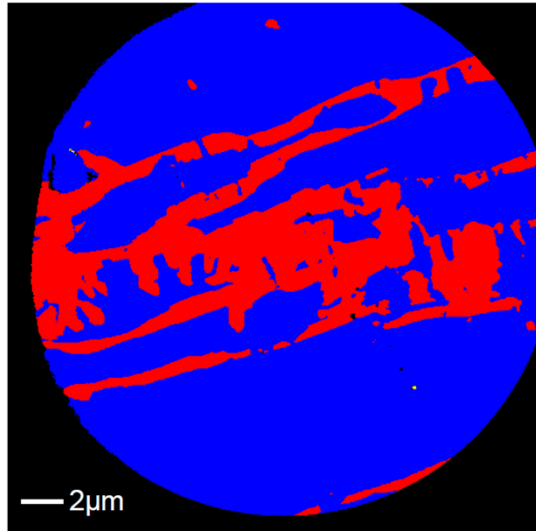

Energy: 4.5eV

Fig. S1. Low-energy electron microscopy (LEEM) data for a sample produced using similar temperature (1950 °C) and annealing time (1800 s) as used for Sample A: a) LEEM image of graphene on the SiC(0001) surface, obtained using an electron energy of 4.5 eV; b) color image of the same  $\sim 25 \mu\text{m}$  diameter region produced from multiple energy spectra in the electron-energy range from 2 eV to 8 eV, with colors showing conducting graphene layers - monolayer is identified in blue and bilayer is shown as red.

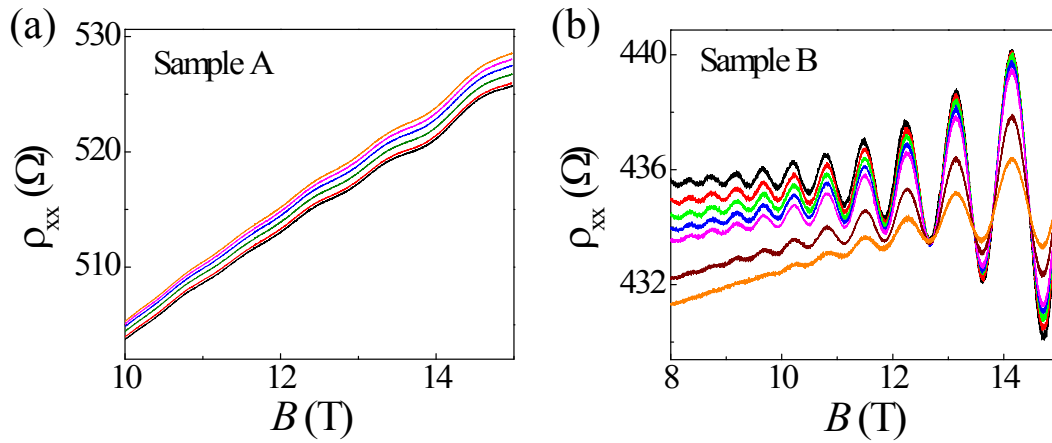

Fig. S2 High-field magneto-resistivity  $\rho_{xx}(B)$  at various temperatures  $T$ . (a) From top to bottom:  $T = 2.4, 3, 4, 5, 6,$  and  $7$  K. (b) From top to bottom:  $T = 3, 5, 7, 9, 11, 20,$  and  $30$  K.

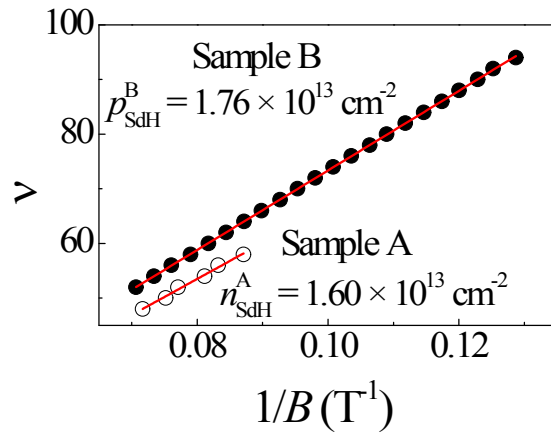

Fig. S3 The filling factor  $\nu$  as a function of  $1/B$ .

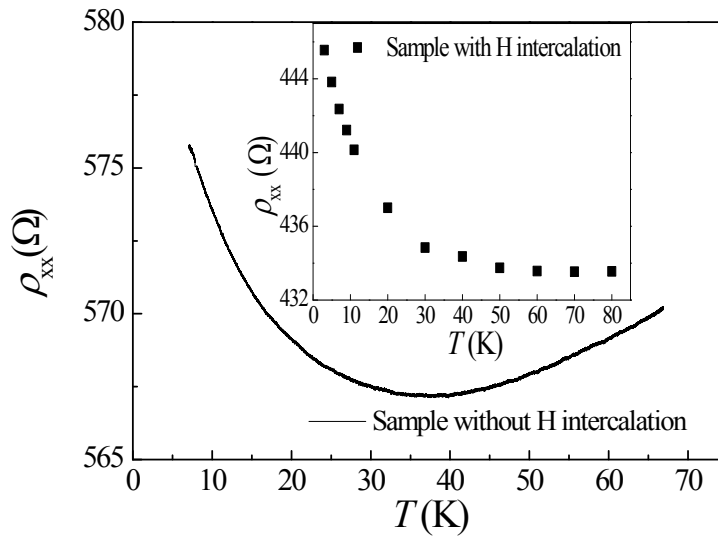

Figure S4 Resistivity measurements  $\rho_{xx}$  as a function of temperature  $T$  for graphene sample without hydrogen intercalation. The inset shows the resistivity measurements as a function of temperature for graphene sample with hydrogen intercalation.

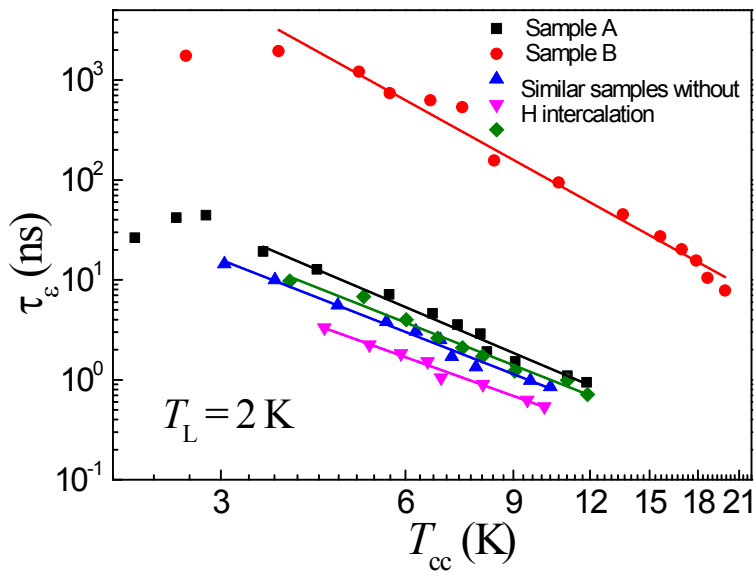

Figure S5 Energy relaxation time  $\tau_{\epsilon}$  as a function of charge carrier temperature  $T_{cc}$  for graphene samples without hydrogen intercalation and for hydrogen-intercalated graphene sample.
